# Supplementary material
Source: publisher figshare collection journal article supplement (https://gsapubs.figshare.com/ndownloader/files/22756457)
Supplement: Supplementary file 1 [file 22756457]

Quantitative and qualitative insights into bedrock landform erosion on the South Indian craton using cosmogenic nuclides and apatite fission tracks, Y. Gunnell et al.; *GSA Bulletin*; May/June 2007; v. 119; no. 5/6; p. 576–585; doi: 10.1130/B25945.1

### **Erosion on inselberg flanks**

Ramadevara Betta rises ca. 130 m above the surrounding plain. Two samples were collected for comparative purposes (cf. Fig. 6B in main manuscript): IN15 is the exposure of a curved sheet parting near the summit; and IN16 represents a residual fragment of weathered outer shell which, stratigraphically, is a downslope continuation of the layer once capping sample IN15. IN15 yields a model erosion rate (cf. Table 3 in main manuscript) of 16.7 m/m.y., much higher than neighboring IN16 (2.4 m/m.y.). However, nothing justifies such a large differential on what we believe is a slowly eroding inselberg. The simplest way to solve the paradox of such contrasting erosion rates on two adjacent bedrock surfaces is to consider that IN15 was until recently shielded at some depth below the surface, and was instantaneously exposed without giving  $^{10}\text{Be}$  concentrations time to relax to a new steady state. In some circumstances bedrock surfaces may look natural but have been quarried, so care must be taken in distinguishing ‘apparent’ erosion rates (requiring correction based on observational evidence in the field) from true erosion rates. For instance, instantaneous exposure could have been caused naturally, i.e., by sheeting of the overlying slab (of which IN16 is a residual). However, IN15 occurs near the summit and critical slope angles are too low for sliding to readily occur. Instead, we suspect from the presence of a small temple nearby that stone was quarried directly from the inselberg, locally stripping the granite sheets along their natural partings. Inselberg quarrying following this technique is widely observed throughout South India. In order to test this hypothesis, we modeled the paleodepth of IN15 before its recent exposure by quarrying. Letting the surface of the sheet initially overlying IN15 erode at a similar rate to that obtained for IN16, so that the measured  $^{10}\text{Be}$  concentration of IN15 was consistent with a steady state assumption (a condition where beryllium concentrations in the rock decrease exponentially downward from the surface), the intercept of the model curve with the measured activity level for IN15 corresponds to a paleodepth of ~1.6 m (Fig. DR1). The hypothesis that recent quarrying is responsible for the apparent offset seems valid, and we conclude that the long-term erosion rates for IN16 and IN15 are identical (ca. 2.4 m/m.y.) and therefore consistent with regional results as plotted on Fig. 7 in main the manuscript.

A neighboring bornhardt, Nijagal (Fig. 6C in main manuscript), is a dome-on-dome inselberg: it exhibits a smaller sugar-loaf hill at 1086 m a.s.l., topping a wider bedrock platform at 1050 m a.s.l., which itself stands proud of the surrounding plain by ca. 150 m. A statistically significant difference is observed between erosion rates on the apex (IN12: ca. 1 m/m.y.) and the lower rock platform (IN11 and IN13: ca. 2 m/m.y., see Table 3 in main manuscript). However, the difference is small, and the more recently exposed rock platform has most likely also reached a  $^{10}\text{Be}$  steady state. Whatever erosion differential existed between IN12 and IN11/IN13 to generate the observed relief probably occurred earlier than the  $^{10}\text{Be}$  detection window, and it is therefore spurious to read too much into the detected differential. Currently, all three sites are positioned in a way that makes them immune to the impacts of erosion occurring on the plain.

**Fig. DR1.** Model paleodepth of sample IN15 exposed by recent quarrying of overlying rock sheets.

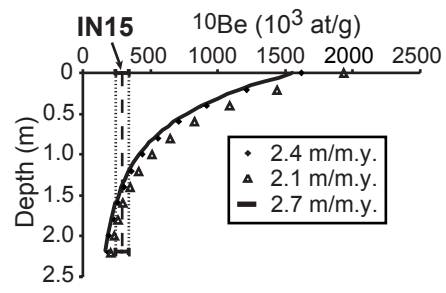

GunnellFigDR1.ai

Table DR1. AFT analytical results for the Karnataka erosional plain

| Lab. No. | Latitude N |     |     | Longitude E |     |     | Elev. | Rock type   | #<br>crys-<br>tals | Dosimetre |       | Spontaneous<br>tracks |       | Induced tracks |       | Age<br>dispersion |             | Central age | Mean track<br>length | S.D. | # of<br>confined<br>tracks |
|----------|------------|-----|-----|-------------|-----|-----|-------|-------------|--------------------|-----------|-------|-----------------------|-------|----------------|-------|-------------------|-------------|-------------|----------------------|------|----------------------------|
|          | Deg        | Min | Sec | Deg         | Min | Sec |       |             |                    | $\rho_d$  | $N_d$ | $\rho_s$              | $N_s$ | $\rho_i$       | $N_i$ | $P(\chi^2)$       | R.E.<br>(%) |             |                      |      |                            |
| IND 1835 | 12         | 22  | 30  | 75          | 32  | 00  | 950   | charnockite | 20                 | 1.121     | 7769  | 2.570                 | 1628  | 2.147          | 1360  | 15                | 10.0        | 223±10      | 12.10±0.20           | 1.95 | 100                        |
| IND 1845 | 12         | 56  | 30  | 76          | 05  | 40  | 980   | gneiss      | 20                 | 1.121     | 7769  | 0.877                 | 742   | 0.659          | 557   | 70                | 0.8         | 248±14      | 12.19±0.22           | 2.21 | 100                        |
| IND 1853 | 12         | 16  | 45  | 76          | 40  | 45  | 1000  | granite     | 20                 | 1.121     | 7769  | 0.967                 | 715   | 1.091          | 806   | 80                | 0.01        | 164±9       | 12.86±0.15           | 1.47 | 100                        |
| IND 1854 | 12         | 17  | 00  | 76          | 41  | 00  | 780   | granite     | 20                 | 1.132     | 7737  | 1.245                 | 932   | 1.431          | 1071  | 30                | 5.1         | 162±8       | 12.78±0.17           | 1.78 | 107                        |
| IND 1859 | 12         | 53  | 40  | 75          | 43  | 50  | 810   | gneiss      | 20                 | 1.344     | 7449  | 1.514                 | 852   | 1.080          | 608   | 90                | 0.1         | 312±17      | 11.58±0.18           | 1.91 | 108                        |
| IND 1863 | 12         | 51  | 20  | 75          | 51  | 00  | 930   | gneiss      | 20                 | 1.344     | 7449  | 1.413                 | 1020  | 0.997          | 720   | 80                | 1.3         | 315±17      | 11.55±0.19           | 1.93 | 107                        |
| IND 1865 | 12         | 51  | 00  | 75          | 43  | 00  | 980   | gneiss      | 20                 | 1.344     | 7449  | 1.513                 | 1101  | 0.929          | 676   | 90                | 6.8         | 360±19      | 12.61±0.19           | 1.99 | 109                        |
| IND 2052 | 13         | 40  | 30  | 75          | 15  | 00  | 640   | gneiss      | 20                 | 1.301     | 9015  | 0.738                 | 592   | 0.689          | 553   | 80                | 0.21        | 232±14      | 11.80±0.23           | 2.28 | 100                        |
| IND 2055 | 13         | 21  | 55  | 75          | 32  | 00  | 750   | gneiss      | 20                 | 1.301     | 9015  | 1.85                  | 1282  | 1.945          | 1348  | 90                | 0.0         | 206±8       | 12.20±0.20           | 2.04 | 104                        |
| IND 2066 | 14         | 23  | 00  | 76          | 05  | 00  | 660   | gneiss      | 20                 | 1.344     | 7449  | 1.262                 | 953   | 0.998          | 754   | 30                | 0.92        | 282±14      | 12.17±0.20           | 1.97 | 100                        |
| IND 2067 | 14         | 16  | 00  | 76          | 21  | 00  | 680   | gneiss      | 20                 | 1.344     | 7449  | 1.494                 | 557   | 1.478          | 551   | 90                | 0.03        | 226±14      | 11.65±0.25           | 2.51 | 100                        |
| IND 2069 | 13         | 32  | 00  | 77          | 00  | 00  | 780   | gneiss      | 20                 | 1.344     | 7449  | 1.135                 | 1172  | 0.878          | 907   | 30                | 9.7         | 287±15      | 11.46±0.20           | 2.00 | 100                        |
| IND 2070 | 13         | 20  | 00  | 77          | 10  | 00  | 830   | gneiss      | 20                 | 1.344     | 7449  | 0.999                 | 704   | 0.783          | 551   | 60                | 1.89        | 285±2       | 11.91±0.25           | 2.63 | 108                        |
| IND 2071 | 12         | 58  | 00  | 77          | 37  | 00  | 900   | gneiss      | 20                 | 1.344     | 7449  | 1.751                 | 1951  | 1.727          | 1925  | 15                | 6.6         | 226±8       | 12.50±0.19           | 1.93 | 103                        |
| IND 2297 | 13         | 11  | 30  | 75          | 24  | 00  | 840   | gneiss      | 20                 | 1.364     | 7449  | 0.560                 | 502   | 0.554          | 496   | 95                | 0.0         | 230±15      | 12.33±0.20           | 2.04 | 104                        |
| IND 2298 | 13         | 15  | 00  | 77          | 15  | 00  | 920   | granite     | 20                 | 1.364     | 7568  | 0.766                 | 653   | 0.748          | 638   | 95                | 0.0         | 232±13      | 11.44±0.27           | 2.67 | 100                        |
| IND 2300 | 12         | 47  | 30  | 75          | 47  | 30  | 900   | gneiss      | 20                 | 1.364     | 7568  | 1.619                 | 1048  | 1.165          | 754   | 40                | 2.2         | 314±16      | 11.89±0.19           | 1.92 | 100                        |
| IND 2305 | 11         | 24  | 12  | 76          | 55  | 13  | 2630  | charnockite | 20                 | 1.364     | 7568  | 0.764                 | 890   | 0.426          | 485   | 95                | 0.0         | 411±24      | 12.76±0.22           | 2.16 | 100                        |
| IND 2307 | 15         | 01  | 55  | 75          | 18  | 00  | 480   | gneiss      | 20                 | 1.364     | 7568  | 0.947                 | 1052  | 0.841          | 935   | 40                | 7.5         | 255±13      | 11.96±0.20           | 2.00 | 102                        |
| IND 2313 | 13         | 44  | 00  | 75          | 00  | 50  | 600   | gneiss      | 20                 | 1.364     | 7568  | 1.008                 | 953   | 1.067          | 1009  | 60                | 0.14        | 215±10      | 11.59±0.24           | 2.37 | 100                        |
| IND 2317 | 15         | 48  | 00  | 75          | 13  | 45  | 620   | gneiss      | 20                 | 1.364     | 7568  | 1.268                 | 668   | 1.006          | 530   | <1                | 30          | 291±27      | 12.25±0.17           | 1.72 | 101                        |
| IND 2321 | 15         | 25  | 25  | 75          | 26  | 30  | 630   | gneiss      | 20                 | 1.364     | 7568  | 0.898                 | 561   | 0.835          | 522   | <1                | 28.6        | 249±22      | 12.54±0.17           | 1.67 | 101                        |
| IND 2323 | 13         | 16  | 55  | 75          | 51  | 45  | 1000  | granite     | 20                 | 1.364     | 7568  | 1.635                 | 1405  | 1.165          | 1001  | 30                | 5.4         | 317±14      | 11.27±0.18           | 1.81 | 100                        |
| IND 2325 | 15         | 33  | 50  | 75          | 21  | 00  | 620   | gneiss      | 20                 | 1.364     | 7568  | 1.771                 | 746   | 1.555          | 655   | 40                | 9.3         | 258±15      | 11.99±0.21           | 2.06 | 102                        |
| IND 2326 | 13         | 32  | 00  | 75          | 20  | 45  | 760   | gneiss      | 20                 | 1.364     | 7568  | 0.723                 | 608   | 0.626          | 527   | 80                | 0.3         | 261±16      | 12.13±0.24           | 2.45 | 103                        |
| IND 2327 | 12         | 02  | 00  | 77          | 03  | 00  | 800   | gneiss      | 20                 | 1.586     | 8792  | 0.492                 | 543   | 0.616          | 681   | 5                 | 17.3        | 217±16      | 12.43±0.18           | 1.86 | 102                        |

Notes: Apatite was separated by using conventional crushing, sieving, heavy liquids, and magnetic techniques. After polishing, fluorapatite crystals > 80 µm across were etched with 5M HNO<sub>3</sub> at 20 ± 1 °C for 20 s. Low-uranium muscovite, used as an external detector, was etched with 48% HF for 50 min. Samples were irradiated at the Risø reactor (Denmark), using the Corning CN5 glass dosimeter. Analyses were carried out on a Zeiss Axioplan microscope (magnification of 1250x), using a dry (100x) objective and involving ≥100 confined track length measurements per sample.

The fission-track age is the central age, which is the mean of the log distribution of single grain ages, weighted by individual measurement precision. The 1σ error indicates the analytical precision while the standard  $\chi^2$  statistic test and the relative error were used to assess the dispersion of individual crystal ages. When  $P(\chi^2) > 5\%$  and R.E. < 15%, it is considered that all the apatite grains in a sample are, allowing for an acceptable level of Poissonian variation, consistent with a single population characterised by a specific fission-track age.

Quantitative thermal histories for each sample were obtained by random guided searches. This modeling procedure proposes best-estimate cooling paths based on the annealing properties of fission tracks at a range of temperatures while using a constant parameter space for temperature and time values. Here, the algorithm, recalibrated on the basis of annealing data for the widely used Durango fluorapatite age standard, was employed to predict the temperature and time dependence of annealing in the samples. Solutions are based on the statistically defined quality of match between 4000 randomly produced cooling histories per sample and the observed age and track-length data. Within the range of solutions, the highest-probability density defines an optimum, which was selected as being the most likely cooling history and hence the most probable corresponding denudation rate.
